# Supplementary material for: Designing Unmanned Aerial Survey Monitoring Program to Assess Floating Litter Contamination
Source: MDPI journal article supplement (doi:10.3390/rs15010084), 2022-12-23
Supplement: s1 [file s1]

# **Supplementary Materials S2**

### Pixel-based colour analysis.

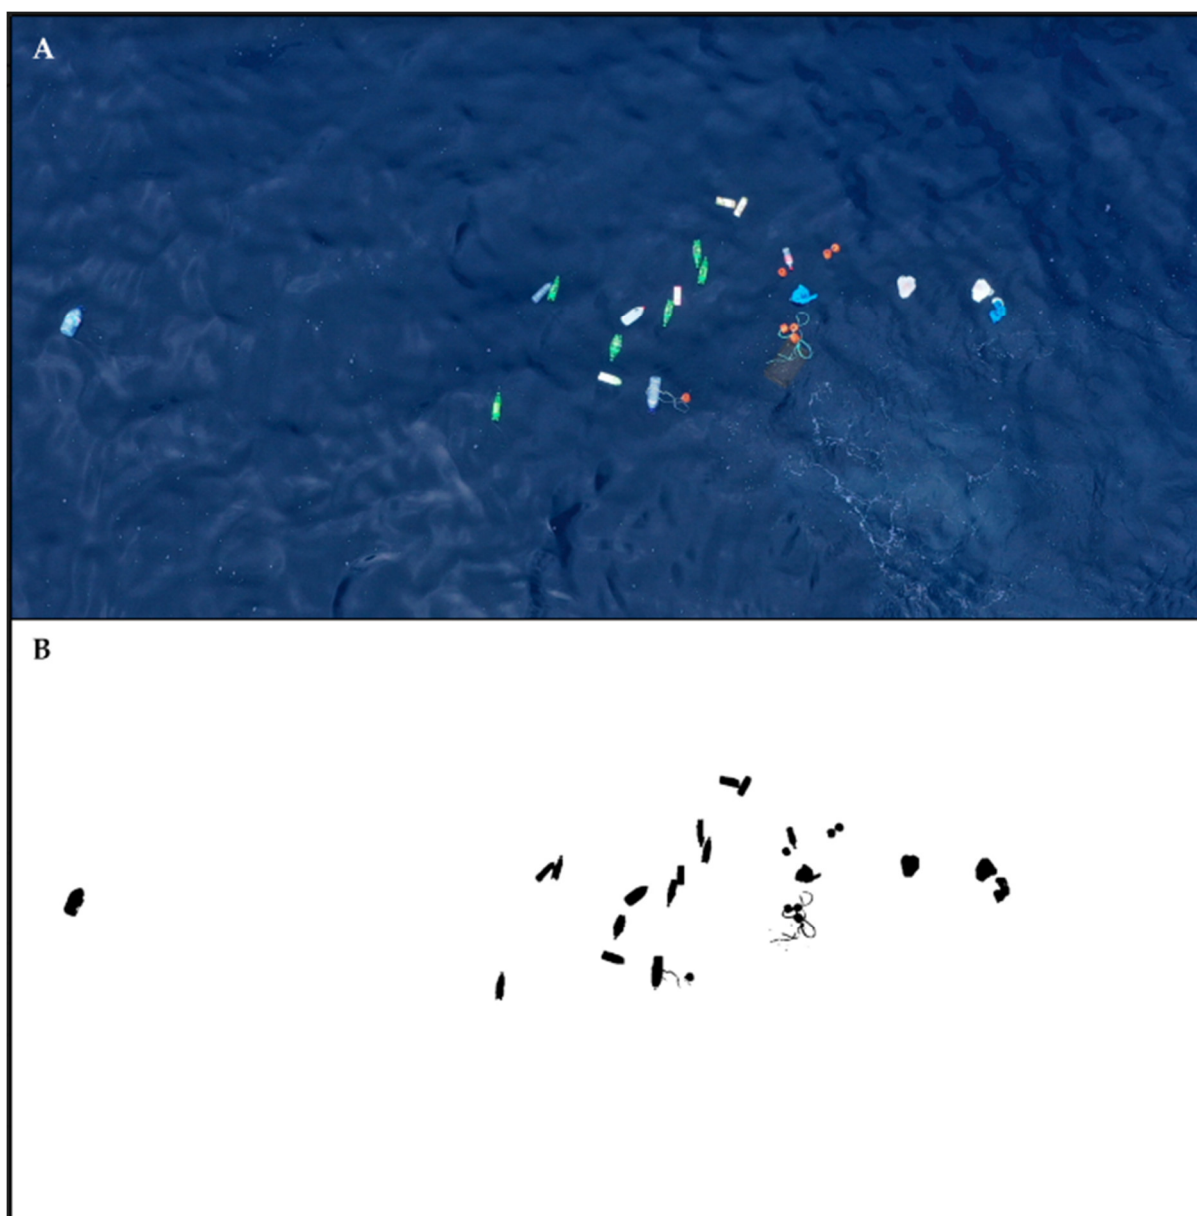

**Figure S1.** A) original processed image from Blue Set, and B) Pixel-based detection of floating debris using colour difference to generate binary image and estimate the proportion of floating debris pixels (%).

Convolutional Neural Networks (CNNs) for automated object detection.

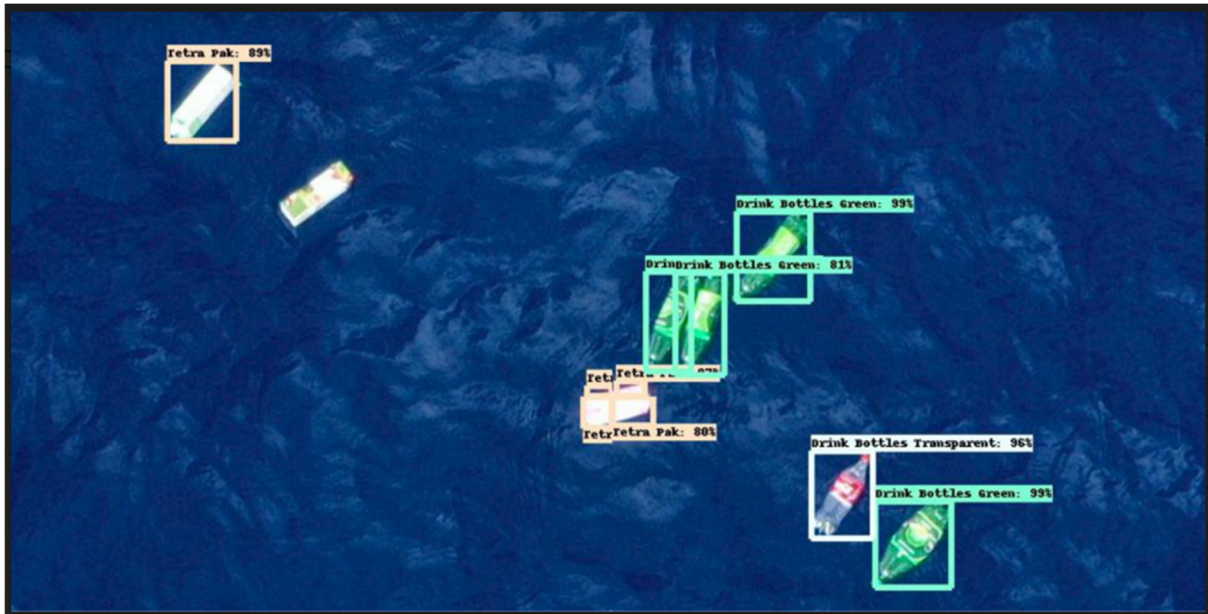

**Figure S2.** Example of automated classification and object recognition using CNN.

## Categories of Classification.

**Table S1.** Floating litter category classes used in image annotation and automated object classification.

| Name                         | Description                                                                                                                         | Blue Set Image (150x150 pixels)                                                     |                                                                                    | Dark Set Image (150x150 pixels)                                                       |                                                                                     |
|------------------------------|-------------------------------------------------------------------------------------------------------------------------------------|-------------------------------------------------------------------------------------|------------------------------------------------------------------------------------|---------------------------------------------------------------------------------------|-------------------------------------------------------------------------------------|
| Cleaner Bottles - Containers | Cleaner Bottles and Containers.<br>Artificial polymer materials.<br>Monitoring Guidance for Marine Litter in European Seas.         |    |                                                                                    |    |                                                                                     |
| Drink Bottles – Green        | Green drink Bottles.<br>Artificial polymer materials.<br>Monitoring Guidance for Marine Litter in European Seas.                    |    |                                                                                    |    |                                                                                     |
| Drink Bottles – Transparent  | Transparent drink bottles.<br>Artificial polymer materials.<br>Monitoring Guidance for Marine Litter in European Seas.              |    |  |    |  |
| Drink Bottles – Large (>5L)  | Large drink bottles, more than 5L.<br>Artificial polymer materials.<br>Monitoring Guidance for Marine Litter in European Seas.      |   |                                                                                    |   |                                                                                     |
| Tetra Pak                    | Tetra Brik Aseptic Packaging Components (polyethylene, aluminum, paper).<br>Monitoring Guidance for Marine Litter in European Seas. |  |                                                                                    |  |                                                                                     |
| Plastic Bags                 | Plastic Bags.<br>Artificial polymer materials.<br>Monitoring Guidance for Marine Litter in European Seas.                           |  |                                                                                    |  |                                                                                     |
| Other Containers             | Other Containers. Diferentes tipos of marine litter (plastic or others materials).                                                  |  |                                                                                    |  |                                                                                     |
| Floating Fishing Gear        | Floating Fishing Gear: nets, lines, buoys, etc                                                                                      |  |                                                                                    |  |                                                                                     |
| Other Floating Debris        | Other Floating Debris.<br>Represents something, a good image but you don't know what it is.                                         |  |                                                                                    |  |                                                                                     |
